# Supplementary material for: Spermatocyte cytokinesis requires rapid membrane addition mediated by ARF6 on central spindle recycling endosomes
Source: Oxford University Press journal article supplement (doi:10.1242/dev.010983), 2007-11-26
Supplement: dev010983tables1.pdf [file dev010983tables1.pdf]

**Table S1. Reduced fertility and chorion defects of *arf6* mutant females**

| Genotype of female                                                   | % eggs hatching when crossed to WT males | % eggs with short or fused dorsal appendages* |
|----------------------------------------------------------------------|------------------------------------------|-----------------------------------------------|
| <i>WT</i>                                                            | 93% ( <i>n</i> =121)                     | 0% ( <i>n</i> =100)                           |
| <i>arf6<sup>1</sup>/arf6<sup>1</sup></i>                             | 38% ( <i>n</i> =178)                     | 32% ( <i>n</i> =203)                          |
| <i>y w Flp;FRTG13 Ovo<sup>D</sup>/FRTG13 arf6<sup>1</sup></i>        | ND                                       | 71% ( <i>n</i> =180)                          |
| <i>y w Flp;FRTG13 Ovo<sup>D</sup>/FRTG13 arf6<sup>3</sup></i>        | ND                                       | 52% ( <i>n</i> =196)                          |
| <i>P(Ubi)Arf6HA arf6<sup>1</sup>/arf6<sup>1</sup></i>                | 79% ( <i>n</i> =169)                     | 0.5% ( <i>n</i> =182)                         |
| ND, not determined; *Collapsed eggs were excluded from the analysis. |                                          |                                               |
